# Supplementary material for: Salivary total α-synuclein, oligomeric α-synuclein and SNCA variants in Parkinson’s disease patients
Source: PubMed Central journal article supplement (PMC4917865; doi:10.1038/srep28143), 2016-06-23

**Salivary total  $\alpha$ -synuclein, oligomeric  $\alpha$ -synuclein and SNCA variants in Parkinson's  
disease patients**

Wenyan Kang<sup>1,2†</sup>, Wei Chen<sup>1†</sup>, Qiong Yang<sup>1</sup>, Lina Zhang<sup>3</sup>, Linyuan Zhang<sup>1</sup>, Xiaoying Wang<sup>1</sup>,  
Fangyi Dong<sup>1</sup>, Yang Zhao<sup>1</sup>, Shuai Chen<sup>1</sup>, Thomas J. Quinn<sup>4</sup>, Jing Zhang<sup>5</sup>, Shengdi Chen<sup>1,§</sup>, Jun  
Liu<sup>1,§</sup>

**Suppl. Figure 1. Salivary total  $\alpha$ -synuclein and PD**

(A) Salivary  $\alpha$ -synuclein levels were measured in normal controls (NC) and PD samples by Luminox. Salivary total  $\alpha$ -synuclein levels did not correlate with gender both in individual PD and control groups ( $p=0.71$ ,  $p=0.32$  when normalized in PD group;  $p=0.75$ ,  $p=0.67$  when normalized in the NC group). (B) Statistical analysis of salivary total  $\alpha$ -synuclein in Hoehn and Yahr's stages of PD, with no significant difference being achieved ( $p>0.05$ ). (C) Salivary total  $\alpha$ -synuclein didn't correlated with disease severity as measured by UPDRS motor scores ( $r=0.11$ ,  $p=0.14$ ;  $r=0.087$ ,  $p=0.22$  when normalized) using linear regression analysis with spearman's correlation, and also checked by partial correlation to controlling for possible confounding variables-age and gender. (D) There is no significant difference among the different drug treatment groups ( $p=0.83$ ,  $p=0.75$  when normalized). (E) Using linear regression analysis with spearman's correlation, levels of total  $\alpha$ -synuclein in saliva didn't correlated with disease duration in PD group ( $r=0.0011$   $p=0.99$ ,  $r=-0.029$ ,  $p=0.68$  when normalized), no in controls neither ( $p>0.05$ ,  $p>0.05$  when normalized). Error bars represent mean  $\pm$  SEM.

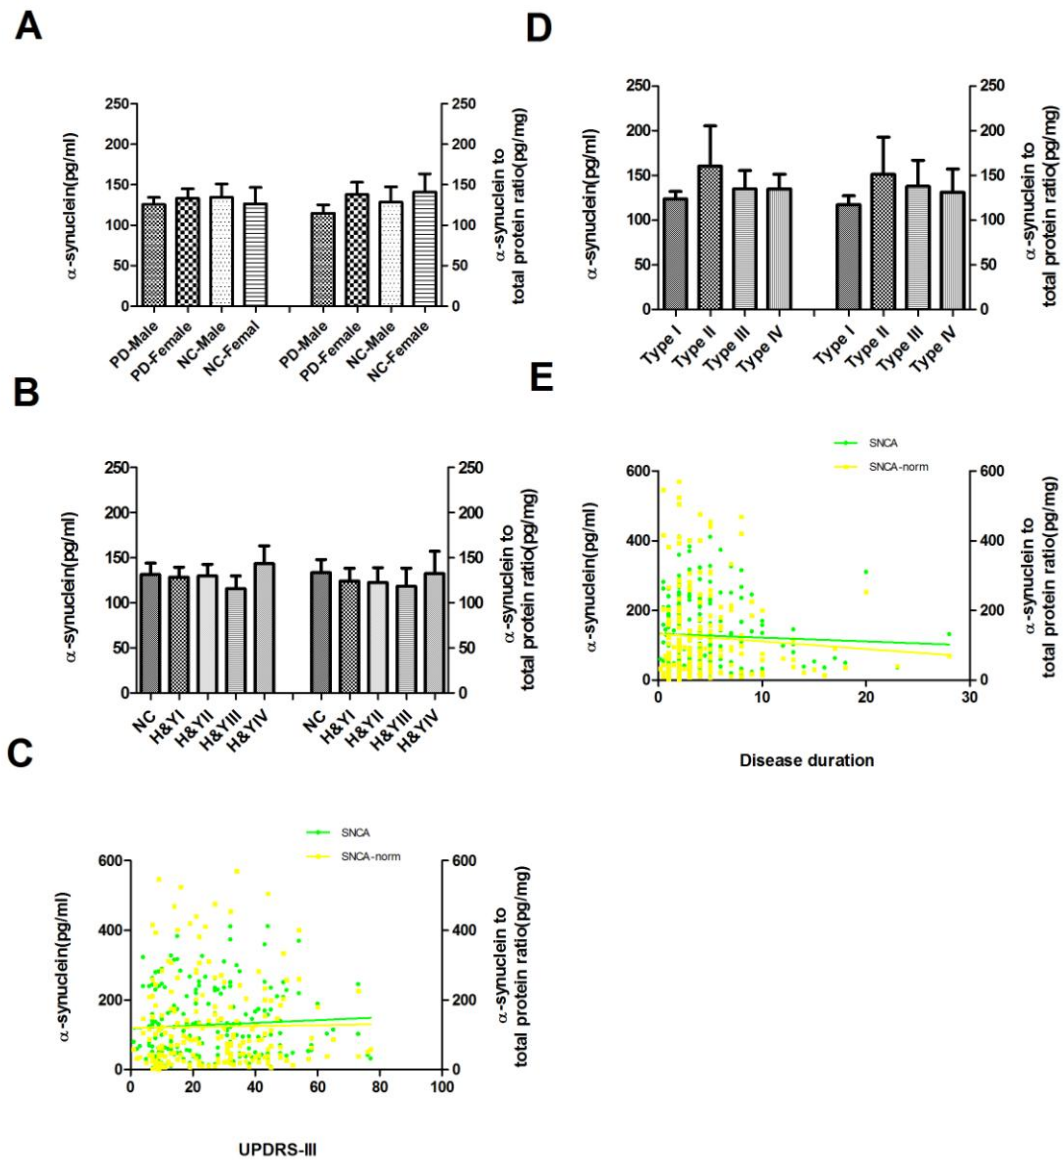

**Suppl. Figure 2. Salivary  $\alpha$ -synuclein and plasma  $\alpha$ -synuclein**

The levels of  $\alpha$ -synuclein in salivary and plasma were measured in 15 normal controls (NC) and 12 PD samples by Luminex. Using linear regression analysis with spearman's correlation, levels of total  $\alpha$ -synuclein in saliva didn't correlated with plasma  $\alpha$ -synuclein in normal controls (A-B,  $p > 0.05$ ), no neither in PD group (C-D,  $p > 0.05$ ).

**A**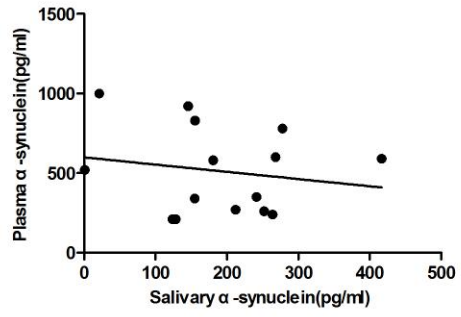**C**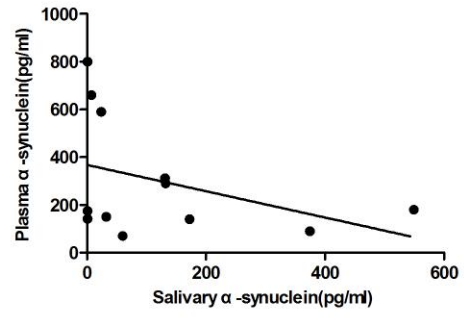**B**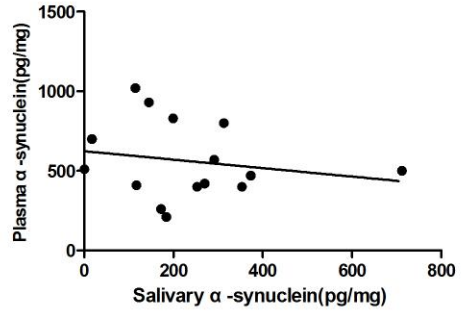**D**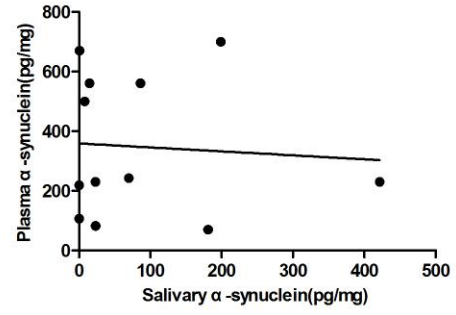

Supplement: srep28143-s1.pdf [file srep28143-s1.pdf]
